# Supplementary material
Source: Research Square preprint supplement (doi:10.21203/rs.3.rs-9853618/v1)
Supplement: Supplementary file 1 [file 9b6d9805ab182b77cf557132.xlsx]

## Sheet: Fig1
Fig1E	Relative BODIPY intensity
	Vector BSA	Vector PA/OA	TRIM46 PA/OA	CBL PA/OA	CUL1 PA/OA	CUL2 PA/OA
	0.822852	7.98179	11.6994	7.48819	8.75941	7.189
	0.905832	6.73125	11.8979	6.7964	9.27983	8.66449
	1.16952	7.71029	12.9508	7.38127	9.58025	8.49578
	1.0867	8.05948	10.9557	5.90118	8.58727	8.547
	1.05985	7.54601	11.0468	6.96471	8.68192	7.44563
	0.924908	8.62555	12.6388	7.20651	9.16712	8.40638
	1.03034	9.39079	11.4914	7.74989	10.4279	8.93385
Fig.1F
	group	NAS	TRIM46-IHC postive-staining intensity(%)
	Normol	1	5.22517
		1	5.03921
		1	4.77845
		2	3.5569
		1	6.18062
	MASLD	3	16.2895
		4	17.2878
		3	12.145
		4	11.7591
		5	12.7543
Fig.1J	Relative Luciferase(fold change vs Vector)
	vector	Flag-CREB3	Flag-EGR1
	0.88635	8.61304	1.10126
	0.944582	8.98818	0.978776
	1.16907	9.26372	1.23125
Fig.1K	Relative mRNA(fold change vs Vector)
	vector	Flag-CREB3
	0.891398	1.94944
	1.15716	2.01557
	0.969475	1.8923
	Relative mRNA(fold change vs shnc)
	shnc	shCREB3
	0.999712	0.495895
	0.945338	0.406492
	1.05813	0.439778
Fig.1L	Relative Luciferase(fold change vs Vector)
	Vector			Flag-CREB3
P(-2100/135)	1.06083	0.997378	0.941788	7.74405	6.58776	7.12437
P(-2100/-1600)	0.921024	1.13384	0.945134	1.10851	0.996966	0.94132
P(-1600/-1100)	1.08134	0.962124	0.956533	1.09215	1.04458	0.830129
P(-1100/-500)	1.03515	1.02228	0.942564	10.9053	11.0354	10.2926
P(-500/135)	0.888462	1.07541	1.03613	1.02436	1.07801	1.20594
Fig.1M	Relative mRNA(fold change vs Vector)
	Vector			Flag-CREB3
p(-1100/-950)	1.08953	1.00372	0.914418	1.08068	1.15559	1.12
p(-950/-800)	0.970177	1.0522	0.979603	13.6635	15.3426	12.7375
P(-800/-650)	1.10381	0.975865	0.928362	1.16424	1.02622	1.14635
P(-650/-500)	1.15904	0.943214	0.914724	1.28534	1.01954	0.965872
Fig.1N	Relative Luciferase(fold change vs Vector)
	Vector			Flag-CREB3
P(WT)	0.829494	0.98153	1.18898	9.21717	8.49797	9.93557
P(mutant)	1.05764	0.901281	1.04108	1.2241	1.09409	1.11694
Fig.1O
	group	CREB3-IHC postive-staining intensity(%)
	Normol	2.60641
		4.60452
		4.32288
		3.17371
		3.4484
	MASLD	9.20648
		10.3172
		8.32127
		8.11074
		11.1541

## Sheet: Fig2
Fig2C	Body weight(g)
	group	0 week	4week	8week	12week	16week
	AAV8-Vector NC	21.9	22.5	26.3	28.1	31.2
		20.3	23.3	25.1	27.5	29.7
		21.8	25.2	27.4	28	30.5
		20.9	24.8	26.7	29	29.6
		21.6	25	27.4	28.2	30.1
		21.9	24.7	26.6	28.1	29.3
	AAV8-TRIM46 NC	22.1	25.9	28.2	29.1	31.2
		22.3	25.7	27.7	29.6	31.6
		22.5	24.2	24.6	25.9	28.7
		22.1	24.7	27.5	28.1	30.1
		21.5	25	26.5	28.3	31.5
		22.8	27	29.1	30.3	31.7
	AAV8-Vecto HFHC	19.8	27.3	29.8	33.5	36.8
		22.8	26.4	29.4	33	37.4
		21.8	25.4	27.4	30.9	34.1
		22.3	25.3	28	32.3	37.4
		20.6	25.5	28.1	32.1	34.5
		22.8	26.7	30.1	33.4	36.8
		21.9	29.7	31.5	33.5	35.4
	AAV8-TRIM46 HFHC	22.1	26.7	30.2	35.1	39.8
		21.4	27	31.9	35.9	38.5
		21.2	28.1	33.9	37.7	41.9
		23.3	28.5	32.8	36.3	40.6
		21.8	27.7	32.9	36.8	39.5
		21.8	27.7	30.2	36.4	41.3
		22.7	29.2	33.7	37.7	40.7
Fig2D
	group	Liver weight(g)	LW/BW(%)
	AAV8-Vector NC	1.24	3.97
		1.03	3.47
		1.15	3.77
		1.12	3.78
		1.17	3.89
		1.08	3.69
	AAV8-TRIM46 NC	1.29	4.13
		1.31	4.15
		0.97	3.38
		1.27	4.22
		1.37	4.35
		1.2	3.79
	AAV8-Vecto HFHC	2.24	6.09
		2.35	6.28
		1.87	5.48
		2.17	5.8
		1.77	5.13
		2.31	6.28
		1.94	5.48
	AAV8-TRIM46 HFHC	2.93	7.36
		2.75	7.14
		3.51	8.38
		3.12	7.68
		3.31	8.38
		3.55	8.6
		3.1	7.62
Fig2E
	group	NAS	ORO positive area（%）	F4/80positive rate(%)	PSR-positive area（%）
	AAV8-Vecto HFHC	4	30.032	7.20721	3.276
		5	37.8556	8.38323	3.84074
		4	51.4893	9.7561	4.11633
		4	40.7251	10.7784	3.44509
		5	42.1644	7.86517	4.05597
		6	38.536	11.5756	5.38894
	AAV8-TRIM46 HFHC	6	58.6777	16.6163	7.29623
		7	75.7351	20.5607	7.70734
		8	66.5281	21.9745	6.81999
		6	60.7912	16.2011	6.30103
		7	68.2984	18.4874	8.38045
		8	64.1525	23.5484	8.04063
Fig2F
	group	TG（mg/g）	TC（mg/g）	NEFA（umol/g）
	AAV8-Vecto HFHC	113.306	16.7664	16.7191
		122.927	13.7859	12.5104
		130.236	18.3505	15.4874
		124.15	16.2651	19.9952
		153.34	19.5505	20.5335
		103.691	11.8877	12.097
		113.93	17.4086	13.7088
	AAV8-TRIM46 HFHC	212.239	26.6626	23.2663
		191.842	26.1509	29.243
		168.318	29.9648	19.2924
		145.272	29.2678	28.2563
		162.907	24.237	34.7099
		202.114	24.0022	36.7707
		151.927	18.6188	24.8233
Fig2G
	group	AST（U/I)）	ALT（U/l）
	AAV8-Vecto HFHC	155.05	188.27
		228.62	266.47
		209.74	185.64
		109.53	141.57
		130.92	178.41
		134.98	141.84
		186.05	236.16
	AAV8-TRIM46 HFHC	346.55	417.6
		210.58	251.79
		204.74	278.16
		217.875	313.68
		230.43	278.1
		253.25	337.45
		260.3	354.2
Fig2H		Relative mRNA(fold change vs Vector)
	group	cd36	Fabp5	srebp1	fasn	scd1	gapt1	dgta2
	AAV8-Vector HFHC	0.915029	0.854159	0.815089	0.950641	1.4946	0.964169	0.887353
		0.957609	0.726714	1.0454	0.550952	0.65075	0.87568	0.628745
		1.21586	0.944637	1.15216	0.790323	0.859502	0.674552	1.21169
		0.798631	1.31977	1.26216	1.18043	0.714803	1.15819	0.829289
		1.10319	1.01284	1.41208	1.36549	1.2659	1.0879	1.47463
		1.05488	1.0386	0.698784	1.01848	1.2112	1.29066	1.22124
		1.00993	1.22841	0.817866	1.47158	1.09146	1.07971	0.990482
	AAV8-TRIM46 HFHC	1.20966	0.739632	0.826674	0.800994	1.11272	1.04775	0.770991
		1.18459	1.33989	1.05975	1.33764	0.805602	0.769633	1.30186
		0.798582	1.14736	1.20769	1.19461	0.947624	0.890667	1.23074
		1.02537	0.813557	0.914762	0.985589	1.22074	0.987607	0.842801
		0.927002	1.48606	1.36845	1.15185	1.73596	1.01593	1.13684
		1.20767	0.99133	1.61748	1.55298	0.962791	1.30237	0.884169
		1.25449	1.23647	1.00587	1.19191	1.10478	0.951072	1.05674
Fig2I		Relative mRNA(fold change vs Vector)
	group	ppara	acox1	cpt1a	ucp2	acadm
	AAV8-Vector HFHC	1.21571	1.5317	1.33812	1.47037	1.38131
		0.918263	0.60083	0.678292	0.678107	0.760148
		0.792336	0.960259	1.12046	1.32817	0.900425
		0.76446	0.799249	0.980615	1.0006	1.01853
		1.39436	1.26413	0.830099	1.10561	0.8294
		1.0235	1.09276	1.16756	0.758207	1.28391
		1.03628	1.02492	1.03463	0.900268	0.975202
	AAV8-TRIM46 HFHC	0.552655	0.609012	0.837573	0.548851	0.683063
		0.60074	0.618889	0.75011	0.511863	0.746915
		0.761815	0.577191	0.810791	0.744394	0.753024
		0.760223	0.767041	0.789863	0.485089	0.656563
		0.859277	0.91658	0.869593	0.815373	0.966279
		0.723763	0.54891	0.921487	0.643013	0.80046
		0.517841	0.457595	0.638739	0.445406	0.586429
Fig2J		Relative mRNA(fold change vs Vector)
	group	tnfa	il1b	Il6	cxcl10
	AAV8-Vector HFHC	0.658916	0.672737	0.750716	0.816343
		1.26756	0.96422	0.794059	0.86556
		1.07096	1.29754	1.24954	1.07995
		1.03239	0.971685	1.00492	1.33921
		1.15878	0.839007	1.21312	0.769926
		0.824228	1.07412	1.06232	1.23173
		1.1338	1.35679	1.03665	1.03184
	AAV8-TRIM46 HFHC	1.62311	2.39659	1.44878	1.48482
		1.14891	1.24776	1.14722	1.15239
		1.53508	1.75595	1.33204	1.64608
		1.80229	1.31968	1.28588	1.35445
		1.59523	1.71896	0.903022	1.25074
		1.64321	1.87411	1.31821	1.21757
		1.22835	1.38518	1.29849	1.55878
Fig2K		Relative mRNA(fold change vs Vector)
	group	tgf1b	col1a1	TIMP1	Ctgf
	AAV8-Vector HFHC	0.670913	0.853481	0.763663	0.772999
		0.94675	0.953609	1.06863	1.0741
		1.05391	1.13653	1.23724	1.16043
		1.16271	1.26165	1.18382	1.31285
		1.30509	1.43582	0.829423	0.841809
		1.15735	0.732665	1.01576	1.1182
		0.850583	0.814535	0.993036	0.839868
	AAV8-TRIM46 HFHC	2.11745	1.60983	1.18687	1.2365
		1.52358	1.23023	1.30754	1.67901
		2.37245	1.47394	1.44816	1.69689
		1.47074	1.54285	1.21495	1.56025
		1.79158	1.34315	0.982651	1.49054
		1.29472	1.39126	1.21873	1.21243
		1.98518	1.37495	1.22488	1.31274

## Sheet: Fig3
Fig3C	Body weight(g)
	group	0 week	4week	8week	12week	16week
	Control NC	25.43	26.4	27.9	30.5	31.1
		22.83	25.3	28.1	30.4	31.1
		23.13	25.2	26	27.8	28.3
		21.48	25.5	28.9	31.8	33.1
		22.21	25.1	27.7	30.5	31.2
	Trim46-HKO NC	23.3	26.1	28.3	29.7	30.3
		22.13	25.5	27.7	29.9	31.7
		22.3	25.7	27.9	30.1	31
		23.41	25.1	25.4	27.3	28.9
		22.3	24.3	25.6	27.2	27.8
	Control HFHC	23.1	29.7	32	35.6	38.5
		23.5	29.9	31.1	34.7	36.9
		23.1	31.3	34.3	37.1	41.3
		23.6	30.4	33.6	37.8	42.3
		21.4	26.6	31	36.1	39.8
		22	26.8	30.4	35.1	38.1
		22.5	24.9	32.7	36.7	39.8
	Trim46-HKO HFHC	20.4	25.4	28.9	31.7	35.1
		20.8	26.8	29.6	33.3	37.6
		23.2	29.2	30.9	34	37.5
		21.2	25.3	29.6	32.9	35.7
		21.5	28.1	30.5	33.8	37.4
		22.6	27.1	29.5	33	36.7
		22.7	25.8	29.8	33.2	36.4
Fig3D
	group	Liver weight(g)	LW/BW(%)
	Control NC	1.32	4.24437
		1.3	4.18006
		1.23	4.34629
		1.25	3.77644
		1.31	4.19872
	Trim46-HKO NC	1.21	3.9934
		1.34	4.22713
		1.23	3.96774
		1.21	4.18685
		1.17	4.20863
	Control HFHC	2.49	6.74797
		3.81	9.22518
		3.56	8.41608
		3.44	7.87185
		2.99	7.51256
		3.14	8.24147
		2.87	7.21106
	Trim46-HKO HFHC	2.14	6.09687
		2.4	6.38298
		2.53	6.74667
		2.08	5.82633
		2.37	6.3369
		2.13	5.80381
		1.97	5.41209
Fig3E
	group	NAS	ORO positive area（%）	F4/80positive rate(%)	PSR-positive area（%）
	control	5	46.0161	9.09091	4.3154
		6	41.2387	10.7649	5.19503
		5	52.5152	13.253	4.59908
		4	46.9097	10.1408	4.05776
		5	44.7396	9.17431	4.91206
		6	39.3584	12.0643	3.98134
	TRIm46-HKO	3	31.7104	4.33526	2.33028
		4	26.2865	4.97238	2.92603
		5	23.4185	7.03125	3.16636
		3	25.3365	6.26703	3.49673
		3	29.7951	5.50725	2.88305
		4	33.9598	7.94521	2.61875
Fig3F
	group	TG（mg/g）	TC（mg/g）	NEFA（umol/g）
	Control HFHC	166	20.3104	27.2251
		119.439	17.4687	18.5263
		145.878	25.7277	21.1264
		124.86	20.7205	16.2362
		144.713	18.434	15.3567
		173.065	15.1388	19.2932
		157.953	14.2503	17.1522
	Trim46-HKO HFHC	91.4834	16.3266	14.123
		74.877	14.4095	13.5714
		113.106	12.0941	15.7642
		105.777	16.7917	11.5042
		100.664	15.469	12.5944
		89.0283	13.2045	13.0583
		92.5397	13.049	16.1532
Fig3G
	group	AST（U/I)）	ALT（U/l）
	Control HFHC	156.65	171.85
		147.21	154.36
		211.85	319.32
		137.55	144.52
		225.43	380.99
		170.95	253.95
		314.71	357.18
	Trim46-HKO HFHC	148.43	142.49
		129.54	106.6
		105.57	134.03
		102.76	49.03
		157.67	192.77
		144.68	151.46
		82.41	55.24
Fig3H	Relative mRNA(fold change vs control)
	group	cd36	Fabp5	srebp1	fasn	scd1	gapt1	gapt1	Dgta2
	Control HFHC	1.20026	1.05181	1.16911	1.16523	1.2783	0.784409	0.784409	0.895835
		0.866696	0.726223	0.679594	0.855787	0.831103	1.01576	1.01576	0.880699
		1.04639	0.801404	1.45528	0.946687	1.21099	0.773943	0.773943	0.811678
		1.34748	1.19779	1.01645	1.28699	0.89973	1.17094	1.17094	1.24147
		1.12157	1.04787	1.24977	1.52681	0.859386	1.21472	1.21472	1.11067
		0.745138	1.32929	0.764354	0.581746	0.696422	1.13001	1.13001	1.16486
		0.815784	0.979109	0.890713	0.926668	1.44344	1.00893	1.00893	0.972223
	Trim46-HKO HFHC	1.28174	0.817046	1.17414	1.2097	0.910679	0.846242	0.846242	1.01191
		1.01277	0.92607	0.944326	0.948058	1.00494	1.24344	1.24344	0.874564
		0.85025	1.07056	0.647833	0.571708	1.44668	1.02961	1.02961	0.702354
		0.821224	1.13119	0.875816	0.775581	1.32827	1.47125	1.47125	1.03197
		0.775497	0.812012	0.754375	1.13923	1.07789	1.3984	1.3984	0.862421
		0.66197	1.48699	0.825439	0.674837	0.861153	0.730088	0.730088	1.21433
		0.870219	0.772645	1.05902	0.936675	1.27095	1.18734	1.18734	0.901799
Fig3I	Relative mRNA(fold change vs Control)
	group	ppara	acox1	cpt1a	ucp1	Acadm
	Control HFHC	1.02553	0.844919	0.900633	0.970531	0.968419
		0.787519	0.974465	0.834789	1.11881	0.736532
		1.06498	0.997126	0.90036	0.670319	0.852503
		1.31567	1.20521	1.34429	0.860246	0.972775
		0.924361	1.23717	1.19684	1.01821	1.23404
		0.657989	0.747124	1.13587	1.19272	1.21555
		1.45292	1.09342	0.808353	1.31509	1.12703
	Trim46-HKO HFHC	1.5252	1.22247	1.23614	1.5179	1.17994
		2.25612	1.31736	1.18338	1.34217	1.47878
		1.43839	1.41311	1.44629	1.21366	1.32528
		1.67301	1.52019	1.32052	1.61811	1.22368
		1.49459	1.4791	1.24948	1.33889	1.31779
		1.36827	1.00363	0.989933	1.49838	1.41221
		1.78263	1.33471	1.28589	1.42654	1.26718
Fig3J	Relative mRNA(fold change vs Control)
	group	Tnf	Il1b	IL6	CXCL10
	Control HFHC	0.816001	0.732316	1.11722	0.825799
		0.98099	0.837866	0.774749	0.941787
		0.805534	1.7045	1.23976	1.08139
		1.14628	1.29459	0.715896	1.04111
		1.25224	1.22226	1.26064	1.13023
		1.45178	0.938119	1.12729	1.34051
		0.744187	0.64413	0.915976	0.753795
	Trim46-HKO HFHC	0.475724	0.389366	0.833636	0.73106
		0.812152	0.696116	0.756265	0.817226
		0.75755	0.650438	0.789984	0.619636
		0.575198	0.407672	0.938359	0.909921
		0.660185	0.588706	0.789434	0.870489
		0.692032	0.539555	0.719427	0.717239
		0.535346	0.491757	0.635785	0.659362
Fig3K	Relative mRNA(fold change vs Control)
	group	tgfb1	col1a1	Timp1	ctgf
	Control HFHC	0.59025	0.87916	0.886752	0.912994
		1.04984	1.18942	0.760187	0.874812
		0.747783	1.07938	0.79979	1.12521
		1.38637	0.912144	1.24963	0.792012
		1.22102	1.22827	1.19474	0.955115
		1.5137	0.929545	1.14794	1.2537
		0.842218	0.850733	1.08225	1.17328
	Trim46-HKO HFHC	0.513344	0.722062	0.817231	0.855402
		0.304006	0.843192	0.909244	0.564161
		0.517266	0.544924	0.670569	0.783234
		0.710016	0.924995	0.72984	0.89217
		0.635832	0.713636	0.955072	0.661071
		0.416197	0.60903	0.805849	0.810517
		0.624763	0.769045	0.719927	0.712086

## Sheet: Fig5
Fig5C	Relative HA-Sgpl1/Actin protein(fold change vs Vector)
	group	0	1	2	4	8	12	hours
	Ad-Vector	1.06003	0.98484	0.974689	0.890846	0.746681	0.533398
		0.958431	0.946293	0.883955	0.757419	0.621032	0.514699
		0.981543	1.05906	0.967077	0.842693	0.768233	0.643561
	Ad-Trim46	0.801607	0.826822	0.627847	0.423466	0.222953	0.215919
		1.04638	1.02151	0.697462	0.559197	0.334215	0.270301
		1.15202	0.930198	0.754361	0.543232	0.2917	0.141726
Fig5O	Relative BODIPY intensity
	Vector	TRIM46	TRIM46（C33R/C36R）	TRIM46（C48R/C53R）
	0.806268	1.48019	1.15175	1.47879
	1.33142	2.01425	1.02011	1.5459
	0.936674	1.73992	0.900975	1.53672
	0.988266	1.66217	1.4304	1.20465
	1.23187	1.82582	0.954993	2.06247
	0.7414	1.54534	1.24305	1.61536
	0.964101	1.32778	1.03245	1.47139

## Sheet: Fig6
Fig6G
	Group	LDs	%LC3 in LDs
	Ad-Vector PA/OA	0.806678	8.4722
		0.836745	7.41363
		1.3318	7.63849
		1.07848	7.16777
		0.788312	8.51806
		0.922565	7.1932
		1.23542	7.93463
	Ad-Trim46 PA/OA	1.43847	4.14234
		1.2559	5.3092
		1.40732	4.92134
		1.55098	3.72191
		1.33298	4.43406
		1.22747	5.74677
		1.32397	5.31749
Fig6H
	Group	LDs	%LAMP1 in-LDS
	Ad-Vector PA/OA	0.792682	11.033
		0.785335	11.7017
		1.02891	9.69567
		1.22734	10.3643
		1.01816	8.5255
		0.830889	10.6987
		1.31669	11.8688
	Ad-Trim46 PA/OA	1.5516	6.5225
		1.22412	4.018
		1.34137	7.15383
		1.48772	6.6195
		1.31569	5.027
		1.41757	4.86667
		1.36043	5.1195
Fig6I
	Group	LDs	%LC3 in LDs
	Ad-Shnc PA/OA	1.04939	8.25983
		0.8348	7.28967
		0.842139	9.43643
		1.14453	7.67333
		1.00978	7.18817
		1.16338	7.69567
		0.955981	8.5255
	Ad-shTrim46 PA/OA	0.754899	12.3703
		0.565086	11.5345
		0.650746	13.2032
		0.599674	11.7047
		0.736991	10.1658
		0.719524	11.8688
		0.698143	12.4197
Fig6J
	Group	LDs	%LAMP1 in-LDS
	Ad-Shnc PA/OA	1.07118	12.5072
		0.942703	11.4992
		1.22777	15.2848
		0.915861	11.7056
		0.813673	13.0944
		0.914317	12.1024
		1.1145	14.1184
	Ad-shTrim46 PA/OA	0.703929	18.4832
		0.775651	17.0704
		0.647623	16.88
		0.701519	16.6896
		0.699163	16.2768
		0.673846	15.888
		0.74237	19.2928
Fig6K	OCR (pmol/min)
	time	Ad-Vector PA/OA			Ad-Trim46 PA/OA			Ad-Vector PA/OA+Eto			Ad-Trim46 PA/OA+Eto
	0	305.415	288.873	316.452	238.519	230.453	260.431	221.563	210.543	218.854	207.754	209.454	214.554
	8	303.81	277.848	314.875	236.437	226.455	257.422	217.342	211.313	216.452	207.32	204.73	210.64
	16	298.996	283.021	317.021	226.544	238.571	256.589	220.412	208.54	212.413	211.123	203.313	208.43
	24	303.24	284.26	306.264	218.731	239.701	243.72	214.415	209.132	206.65	210.431	197.76	209.218
	32	142.763	167.981	145.554	141.41	140.035	124.68	131.768	144.536	137.838	129.988	125.956	125.722
	40	139.88	144.009	142.691	127.535	142.75	135.624	135.342	141.448	135.394	129.176	129.976	129.437
	48	152.785	137.636	165.41	136.204	129.813	143.226	144.536	138.25	140.168	126.264	125.732	120.905
	56	514.293	485.441	515.452	399.589	380.764	381.942	347.916	339.248	335.108	330.479	316.681	340.479
	64	510.298	482.524	508.659	395.439	367.475	379.652	343.906	335.822	329.847	315.808	311.489	320.487
	72	508.31	465.099	495.001	384.911	355.644	378.383	324.108	332.847	334.189	312.047	310.488	327.489
	80	83.0712	75.391	82.0108	78.1068	81.2595	75.7155	87.1541	78.221	80.4353	81.229	82.841	78.133
	88	75.4493	83.1526	82.0559	73.6507	71.3595	78.0683	76.8141	78.441	76.813	71.432	71.441	76.5171
	96	72.7672	74.954	67.2573	67.6038	65.8566	67.8138	74.0432	76.241	75.141	76.285	75.24	76.032
	group	Ad-Vector PA/OA			Ad-Trim46 PA/OA			Ad-Vector PA/OA+Eto			Ad-Trim46 PA/OA+Eto
	Basal respiration	223.547	199.869	234.965	152.894	167.212	178.521	143.598	130.099	135.6	139.691	131.872	131.913
	ATP production	159.116	139.013	174.33	99.0097	95.8213	120.965	85.07	67.092	77.019	81.947	73.337	78.9932
	protonLeaK	64.4307	60.856	60.6353	53.8839	71.3905	57.5559	58.5279	63.007	58.581	57.744	58.535	52.9197
	Maximal	434.848	399.371	426.603	321.788	296.115	301.584	267.092	257.381	253.034	244.376	240.048	243.97
Fig6L	OCR (pmol/min)
	time	Ad-shNC PA/OA			Ad-shTrim46 PA/OA			Ad-shNC PA/OA+Eto			Ad-shTrim46 PA/OA+Eto
	0	262.473	231.564	228.456	307.564	315.454	353.146	198.35	189.564	182.439	190.013	194.543	187.645
	8	259.513	232.647	230.772	302.377	318.394	349.264	201.965	184.885	179.482	190.512	190.529	185.238
	16	254.281	236.303	229.203	310.474	325.498	347.514	189.12	181.996	178.889	194.132	182.346	183.315
	24	268.6	230.518	225.522	295.042	320.315	351.332	192.846	179.889	182.593	187.38	185.183	187.923
	32	127.295	117.602	131.515	138.378	148.537	136.311	138.373	138.825	132.066	126.963	140.526	137.941
	40	120.345	118.139	129.348	129.38	130.912	141.568	132.38	124.966	125.314	128.498	129.451	131.729
	48	117.428	110.19	125.349	113.236	122.783	139.153	123.301	116.059	129.627	124.261	116.786	134.934
	56	403.065	391.354	420.863	542.644	591.957	563.771	312.305	324.071	304.569	326.26	337.274	323.532
	64	392.068	383.09	406.869	537.519	587.549	544.364	300.1	310.33	303.074	317.943	331.955	321.929
	72	382.412	372.736	398.321	515.413	559.357	538.306	280.705	312.741	298.495	305.817	291.819	310.103
	80	78.0684	70.09	76.9116	86.9436	76.092	101.244	72.1596	85.3284	86.5188	89.5092	87.1284	75.0864
	88	73.7536	68.5572	64.9608	70.2824	69.292	74.7016	89.1276	77.1852	75.7912	78.5068	72.9104	74.5644
	96	67.3824	61.368	61.3716	71.3496	64.2072	73.0696	70.7552	69.5864	64.0296	64.748	67.7864	69.28
	group	Ad-shNC PA/OA			Ad-shTrim46 PA/OA			Ad-shNC PA/OA+Eto			Ad-shTrim46 PA/OA+Eto
	Basal respiration	180.527	167.746	164.242	240.191	256.206	272.813	99.9921	104.811	103.098	115.625	109.436	108.75
	ATP production	133.936	118.164	99.8555	181.093	194.586	205.946	56.7394	57.0307	53.5748	65.6344	52.8952	51.5854
	protonLeaK	46.5915	49.5819	64.3868	59.0981	61.6201	66.8667	43.2527	47.7804	49.5231	49.9907	56.5407	57.165
	Maximal	318.314	314.533	341.908	467.237	518.257	469.662	210.972	233.145	227.283	239.436	259.045	247.365

## Sheet: Fig 7
Fig7C
	group	Body weight (g)	Liver weight (g)	Liver weight/ Body weight（%)
	Control Vehicle	36.54	2.41	6.59551
		39.14	2.73	6.97496
		38.32	2.63	6.86326
		37.61	2.67	7.09918
		37.29	2.69	7.21373
	Trim46-HKO Vehicle	33.43	1.53	4.57673
		34.43	1.64	4.76329
		36.21	2.16	5.9652
		35.32	1.72	4.86976
		34.87	1.83	5.24806
	Control THI	41.66	3.35	8.04129
		38.59	2.93	7.59264
		39.37	3.26	8.28042
		42.72	3.12	7.30337
		41.58	3.23	7.76816
	Trim46-HKO THI	42.84	3.34	7.79645
		39.25	3.12	7.94904
		38.17	2.89	7.57139
		41.24	3.13	7.58972
		42.14	3.31	7.85477
Fig7D
	group	NAS	ORO positive area（%）	PSR-positive area（%）	F4/80positive rate(%)
	Control Vehicle	6	51.3718	5.0741	15.407
		6	43.7238	4.55775	12.1387
		5	46.8102	4.30246	15.7459
		4	49.6158	4.25912	14.5455
		6	40.1866	4.87317	17.8886
	Trim46-HKO Vehicle	4	37.7552	2.91179	10.6061
		3	35.9983	3.16477	7.30994
		3	34.612	2.88436	8.72274
		4	31.1767	2.55742	8.31099
		3	37.3498	2.77537	10.6742
	Control THI	6	69.3765	7.67758	30.4348
		7	64.5991	6.85514	25.2055
		8	65.9469	7.30157	28.4431
		7	73.1069	8.0334	21.7514
		8	65.2632	7.18239	23.3244
	Trim46-HKO THI	8	60.5483	7.33762	24.5665
		8	75.5946	7.10064	25.6906
		7	70.1706	6.50633	29.8295
		6	67.3026	7.63563	27.1468
		7	63.547	7.9479	22.3496
Fig7E
	group	TG（mg/g）	TC（mg/g）
	Control Vehicle	168.865	19.1174
		136.416	15.3029
		144.84	16.4126
		161.838	20.4836
		152.381	18.0561
	Trim46-HKO Vehicle	107.406	11.1978
		98.6557	8.31047
		88.013	8.99902
		90.5876	9.40085
		80.4164	7.29386
	Control THI	177.891	19.0177
		249.542	29.1513
		193.252	27.0885
		204.921	26.6531
		218.663	24.9141
	Trim46-HKO THI	181.324	21.5989
		238.352	25.7042
		185.47	28.1481
		202.325	26.27
		244.022	22.4787
Fig7F
	group	AST（U/I)）	ALT（U/l）
	Control Vehicle	173.68	279.01
		198.01	266.74
		222.66	253.48
		259.34	346.1
		192.48	293.23
	Trim46-HKO Vehicle	156.58	207.88
		131.69	158.92
		144.27	168.08
		111.47	124.25
		124.24	154.76
	Control THI	329.25	443.06
		329.42	576.5
		288.15	545.54
		218.17	371.9
		239.59	436.6
	Trim46-HKO THI	277.4	491.38
		319.78	395.04
		335.37	545.54
		263.81	348.4
		239.13	427.43
Fig7G	Relative mRNA(fold change vs Control Vehicle)
	group	cd36	Fabp5	Srebp1c	PPAra	Acc1	Fasn	Scd1	Dgat2
	Control Vehicle	0.99194	1.19445	0.833634	1.27327	0.945945	0.977093	1.22427	0.983891
		1.18326	1.06469	1.17127	1.03612	1.31525	1.25996	0.982891	1.33061
		0.6877	0.811181	0.860944	0.798852	0.643268	0.7322	0.744863	0.806008
		1.17961	0.740735	0.906538	1.0633	1.14264	0.998553	0.790851	1.00134
		1.05026	1.30867	1.31222	0.892374	1.09351	1.11098	1.41074	0.946417
	Trim46-HKO Vehicle	0.91815	0.703069	0.757312	1.49007	0.770527	0.934209	1.13725	0.768724
		0.660246	0.764324	0.791536	1.34756	0.916897	0.701769	1.31567	0.627466
		0.707654	0.654792	0.696586	0.872137	0.693167	0.749582	1.51955	1.07659
		0.785459	0.822977	0.765567	1.12922	0.884589	0.81755	0.893193	0.818498
		1.00984	1.04371	1.10695	1.30133	0.739834	0.789747	1.2562	0.730758
	Control THI	0.83856	1.32757	0.971883	0.663347	1.38182	1.39137	0.735719	1.14395
		1.15471	1.26711	1.39198	1.00931	1.29845	1.28653	0.87347	1.31409
		1.23367	0.79306	0.998747	0.68827	0.858494	0.789318	1.04651	1.29017
		1.20577	1.443	1.20609	0.73342	1.28901	0.856639	0.878344	0.935627
		1.04835	0.883825	1.21239	0.938747	0.949615	1.34402	0.798016	1.32338
	Trim46-HKO THI	0.956808	0.978236	1.53841	0.727436	1.4103	1.20356	0.896139	1.45773
		0.819686	0.751959	1.21026	1.0092	1.26522	1.38906	0.785039	0.918269
		1.14523	1.40204	1.04288	0.875632	0.909669	0.846801	0.841205	1.20861
		1.37334	1.1249	1.09787	0.685771	1.27854	1.13364	0.845652	0.791664
		1.56922	1.31973	1.03595	0.991132	0.747415	0.915242	0.957523	1.45515
Fig7H	Relative mRNA(fold change vs Control Vehicle)
	group	PPARa	Acox1	Ctp1a	Ucp2	Acadm
	Control Vehicle	0.87482	1.03447	0.976351	1.0137	1.16323
		1.34143	1.36107	1.20808	1.3074	1.37035
		0.88917	0.955958	0.841463	0.89337	0.83635
		0.807534	0.645547	0.825345	0.721369	0.749643
		1.18677	1.1509	1.22075	1.17084	1.0006
	Trim46-HKO Vehicle	1.84755	2.02643	1.60966	2.43347	1.64375
		1.57554	1.48908	1.45968	1.68416	1.90431
		1.97533	2.14549	1.21437	1.91404	2.03342
		1.95828	1.61709	1.64722	2.6821	1.52078
		1.24546	1.73247	1.76362	2.00212	2.35262
	Control THI	0.588212	0.247577	0.714713	0.473179	0.74177
		0.670554	0.550725	0.610176	0.556073	0.383776
		0.381079	0.451356	0.667357	0.616989	0.640184
		0.468936	0.659568	0.491874	0.541919	0.428043
		0.508334	0.547385	0.599421	0.461838	0.590426
	Trim46-HKO THI	0.380357	0.346411	0.639327	0.504059	0.60926
		0.487291	0.434224	0.540058	0.558556	0.419457
		0.466185	0.49406	0.613979	0.62001	0.573221
		0.697953	0.52026	0.645681	0.396806	0.459856
		0.625378	0.65146	0.556942	0.550555	0.711461
Fig7I	Relative mRNA(fold change vs Control Vehicle)
	group	TNFa	IL1b	Il6	cxcl10
	Control Vehicle	1.29399	1.20079	1.1032	1.13804
		1.06689	1.19436	0.853622	1.33537
		1.14681	1.00313	0.792298	0.733304
		0.868617	0.765778	1.33921	0.868451
		0.727157	0.907683	1.00079	1.03327
	Trim46-HKO Vehicle	0.483936	0.398245	0.702892	0.382265
		0.24052	0.337697	0.598909	0.411776
		0.547439	0.668104	0.403914	0.388505
		0.297941	0.574835	0.511955	0.48114
		0.467703	0.504342	0.458014	0.554769
	Control THI	1.55538	2.54203	1.30248	1.70157
		1.47331	1.63055	1.81823	1.75515
		1.84602	2.37793	1.28405	2.20494
		1.4044	1.68709	1.53196	1.6486
		2.12033	1.74461	1.59025	2.08039
	Trim46-HKO THI	2.09795	1.80248	1.88147	2.16268
		1.43078	2.3346	1.65429	1.93208
		1.36283	1.47774	1.2623	1.60773
		1.85901	2.01754	1.35007	1.40409
		1.63683	2.62105	1.50942	2.10854
Fig7J	Relative mRNA(fold change vs Control Vehicle)
	group	Tgfb1	Col1a1	Tmip1	Ctgf
	Control Vehicle	1.05356	0.797842	1.18362	0.907792
		0.790324	0.806429	1.28926	0.76687
		1.26608	1.1999	0.73699	0.896195
		0.766062	1.03058	0.961073	1.18998
		1.23826	1.25687	0.925189	1.34695
	Trim46-HKO Vehicle	0.481675	0.297402	0.698534	0.421879
		0.532005	0.364642	0.576541	0.585597
		0.383286	0.217056	0.420996	0.419779
		0.423955	0.332954	0.635051	0.371861
		0.275303	0.444803	0.612247	0.637057
	Control THI	1.7927	2.47694	1.61843	1.64491
		2.878	3.03656	1.39002	1.41714
		1.88359	2.26469	1.85415	1.84122
		1.99392	1.90691	1.3623	1.56252
		2.60179	3.53586	1.59079	1.39069
	Trim46-HKO THI	2.69911	3.44921	1.48844	1.78448
		3.02738	2.72228	1.39719	1.31242
		1.87777	3.02368	1.6654	1.69075
		1.50159	1.85117	1.33821	1.56428
		2.40766	2.65273	1.84085	1.55638

## Sheet: FigS1
	FigS1-A
		Group	autophagosomes per cell
		AAV8-Vector	6.66667
			4.66667
			5.16667
			7.5
			5.33333
			6
		AAV8-Trim46	2
			2.33333
			3.66667
			1.83333
			2.5
			2.5
	FigS-B	Group	autophagosomes per cell
		control	6.83333
			5.33333
			6
			7.5
			5.16667
			6
		Trim46-HKO	11.5
			10.3333
			12.8333
			9.16667
			11
			9.5

## Sheet: FigS3
FigS3-C
	Group	LDs	%LC3 in LDs
	Shnc DMSO	1.21806	6.881
		1.14585	7.3725
		1.02447	7.66617
		0.884244	10.813
		1.10305	7.99383
		0.79012	8.51933
		0.834203	9.64917
	ShTrim46 DMSO	0.828448	11.9598
		0.627646	13.2705
		0.768227	10.9428
		0.728319	12.9598
		0.697066	14.2535
		0.704252	13.1067
		0.78474	14.2875
	Shnc THI	1.34047	4.71717
		1.54117	5.9065
		1.2707	3.3895
		1.37668	4.898
		1.5424	5.4065
		1.51725	6.55333
		1.39735	3.4065
	ShTrim46 THI	1.51206	4.82567
		1.32989	5.55333
		1.45841	6.18833
		1.2705	5.3725
		1.3065	5.15117
		1.5717	3.78833
		1.46251	4.04483
FigS3-E
	Group	LDs	%LAMP1 in-LDS
	Shnc DMSO	1.22077	9.41952
		1.09879	11.597
		0.779856	13.1481
		1.24094	11.2045
		0.947735	9.98944
		0.863871	12.5594
		0.848035	10.5782
	ShTrim46 DMSO	0.628913	16.918
		0.653412	14.503
		0.626178	14.9368
		0.728281	14.5218
		0.788837	17.3406
		0.740076	16.3954
		0.658338	13.533
	Shnc THI	1.46935	5.06464
		1.30896	4.24208
		1.35834	5.65336
		1.44767	4.41952
		1.56068	6.06464
		1.48162	4.8308
		1.33421	5.3496
	ShTrim46 THI	1.41259	4.63456
		1.51772	5.6308
		1.28919	6.65336
		1.45429	5.24208
		1.39045	5.86088
		1.56771	4.22328
		1.38443	5.8308
FigS3-F	OCR (pmol/min)
	time	Shnc DMSO			ShTrim46 DMSO			Shnc THI			ShTrim46 THI
	0	289.573	261.623	290.835	340.59	383.735	359.533	218.352	198.626	206.491	215.632	216.651	199.47
	8	278.707	260.841	289.965	339.571	382.587	358.457	217.699	198.032	205.873	214.987	216.003	198.873
	16	267.474	259.496	285.396	343.667	376.691	360.708	197.083	189.108	211.124	207.083	206.108	197.124
	24	273.794	251.712	283.715	336.235	381.508	349.526	198.652	188.925	203.942	208.652	211.925	189.942
	32	127.765	122.348	131.553	137.684	127.8	140.929	120.1	103.216	129.345	121.1	122.216	137.345
	40	112.354	121.507	121.5	111.535	110.345	133.393	111.951	96.7613	122.809	114.951	113.761	132.809
	48	109.877	118.113	116.996	122.033	107.443	122.851	109.753	93.8592	113.267	100.753	115.859	105.267
	56	435.618	472.861	448.87	584.103	621.37	586.639	344.473	359.74	355.009	373.473	361.74	375.009
	64	438.289	468.712	433.943	561.303	615.335	558.604	341.673	357.705	332.974	361.673	354.705	378.974
	72	423.522	449.001	414.692	567.723	593.93	538.142	326.093	338.3	328.512	358.093	346.3	360.512
	80	71.4941	77.5121	81.5301	74.8901	85.8471	66.8071	69.3524	68.3094	71.2694	75.3524	64.5309	81.2694
	88	70.5651	71.5681	79.5711	71.8391	71.8471	63.8551	71.3014	57.3094	64.3174	67.3014	62.3094	74.3174
	96	68.5891	63.5771	63.5801	66.8951	75.9431	64.9951	56.8951	55.9431	64.9951	61.8951	53.8941	68.4295
	group	Shnc DMSO			ShTrim46 DMSO			Shnc THI			ShTrim46 THI
	Basal	196.909	187.928	205.825	271.828	304.844	296.853	125.782	131.798	146.806	139.782	143.798	122.806
	ATP coupled	155.12	137.989	163.896	232.132	266.346	227.315	85.1319	92.3463	88.3148	92.1319	92.3463	64.3148
	proton LeaK	41.7892	49.9393	41.9291	39.6962	38.4981	69.5378	40.6499	39.4519	58.4915	47.6499	51.4519	58.4915
	Maximal	367.724	397.144	354.372	489.464	543.488	494.749	270.372	300.396	268.656	294.372	292.396	304.656
