# Supplementary material
Source: Research Square preprint supplement (doi:10.21203/rs.3.rs-9853618/v1)
Supplement: Supplementary file 1 [file b1faf903aecfbb814b7804fa.docx]

**Supplementary Materials**

**Tripartite motif 46 aggravates MASLD progression by suppressing SGPL1- mediated hepatic lipophagy**

Li Xiao1,#, Dating Sun4,#, Yaoyao Jin3, Yifan Qin2, Ziwei Zhou3, Jialin Zhao2, Yuanhan Geng2, Sumei Ren2, Hui Ding1, Bingyong Zhang1, Zhi-Gang She5, Yaping Guo3,*, Junyong Wang1,2,*

*1 Department of Gastroenterology, Henan Provincial People’s Hospital & Zhengzhou University People’s Hospital, Zhengzhou University, Zhengzhou, 450003, China.*

*2 State Key Laboratory of Metabolic Dysregulation & Prevention and Treatment of Esophageal Cance, School of Convergence Medicine, Tianjian Laboratory of Advanced Biomedical Sciences, Zhengzhou University, Zhengzhou, 450052, China.*

*3 Department of Pathophysiology, School of Basic Medical Sciences, Zhengzhou University, Zhengzhou, 450001, China.*

*4 Department of Cardiology, The First Affiliated Hospital of Wenzhou Medical University, Wenzhou, 325000, China.*

*5 Department of Cardiology, Renmin Hospital of Wuhan University, Wuhan 430072, China; State Key Laboratory of New Targets Discovery and Drug Development for Major Diseases, Ganzhou 341000, China; Gannan Innovation and Translational Medicine Research Institute, Gannan Medical University, Ganzhou 341000, China.*

# These authors contributed equally: Li Xiaoand Dating Sun

*Corresponding authors: Yaping Guo: [guoyaping@zzu.edu.cn](mailto:guoyaping@zzu.edu.cn), Junyong Wang: [wangjunyong@zzu.edu.cn](mailto:wangjunyong@zzu.edu.cn)


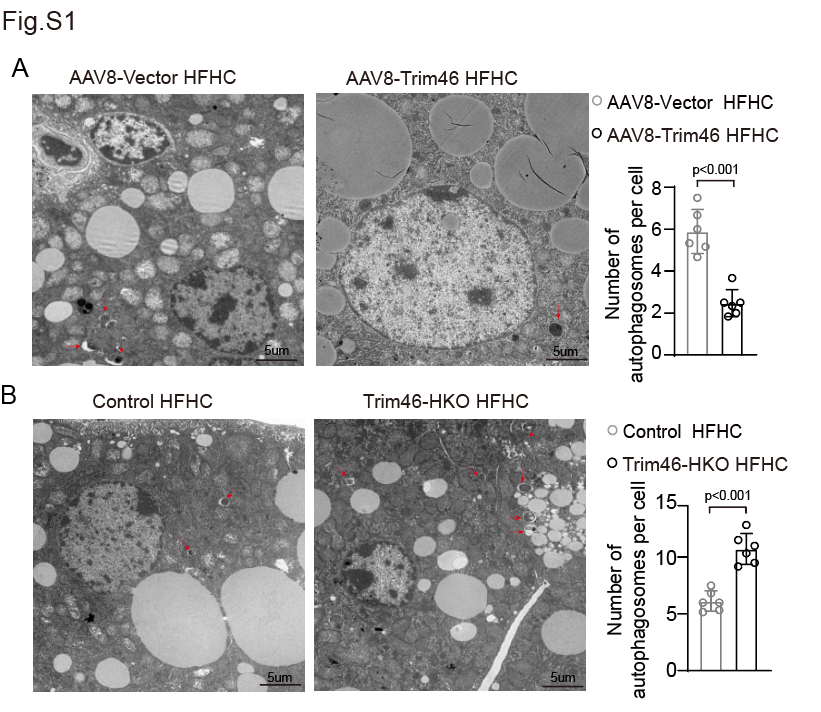


**Supplementary Fig. S1.** (A-B) Electron microscopy analysis of liver sections from AAV8-Vector/AAV8-*Trim46* (A) and Control/ *Trim46*-HKO (B) mice. Purple arrows indicate autophagosomes. Quantitative analysis of autophagosomes per cell is shown in the right panel. Scale bar, 5um. *n =* 6 mice per group. All data are shown as the mean ± s.d.


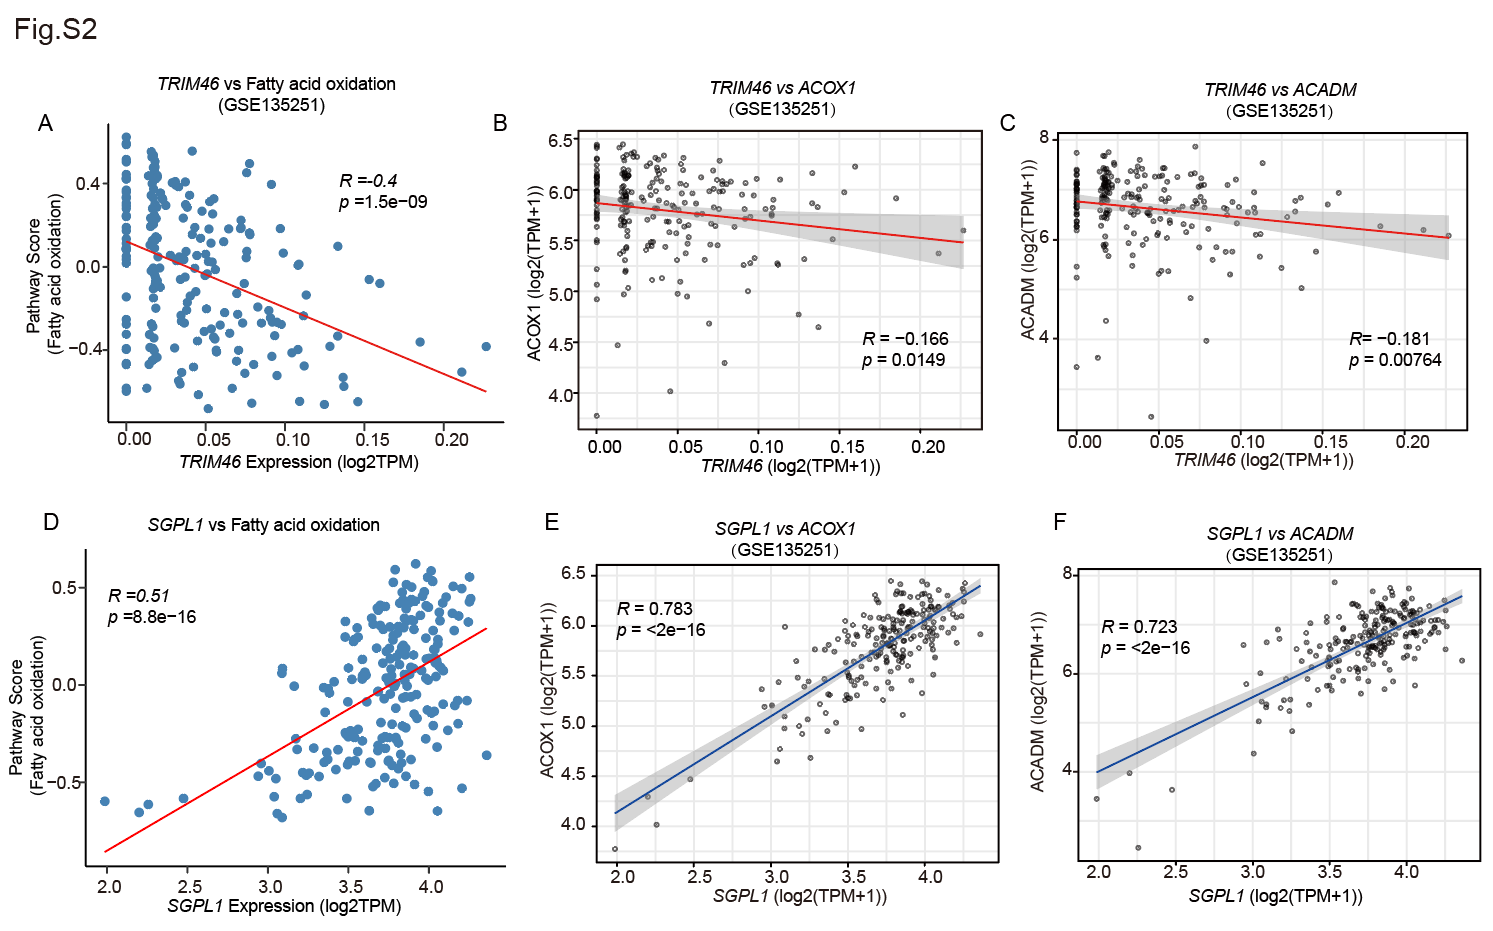


**Supplementary Fig.S2.** (A-C) The correlation analysis between TRIM46 expression and Fatty acid oxidation pathway (A) or ACOX1/ACADM genes (B-C) in human GEO database (GSE13525). (D-F) the correlation analysis between SGPL1 expression and fatty acid oxidation pathway (D) or ACOX1/ACADM genes (E-F) in human GEO database (GSE13525).


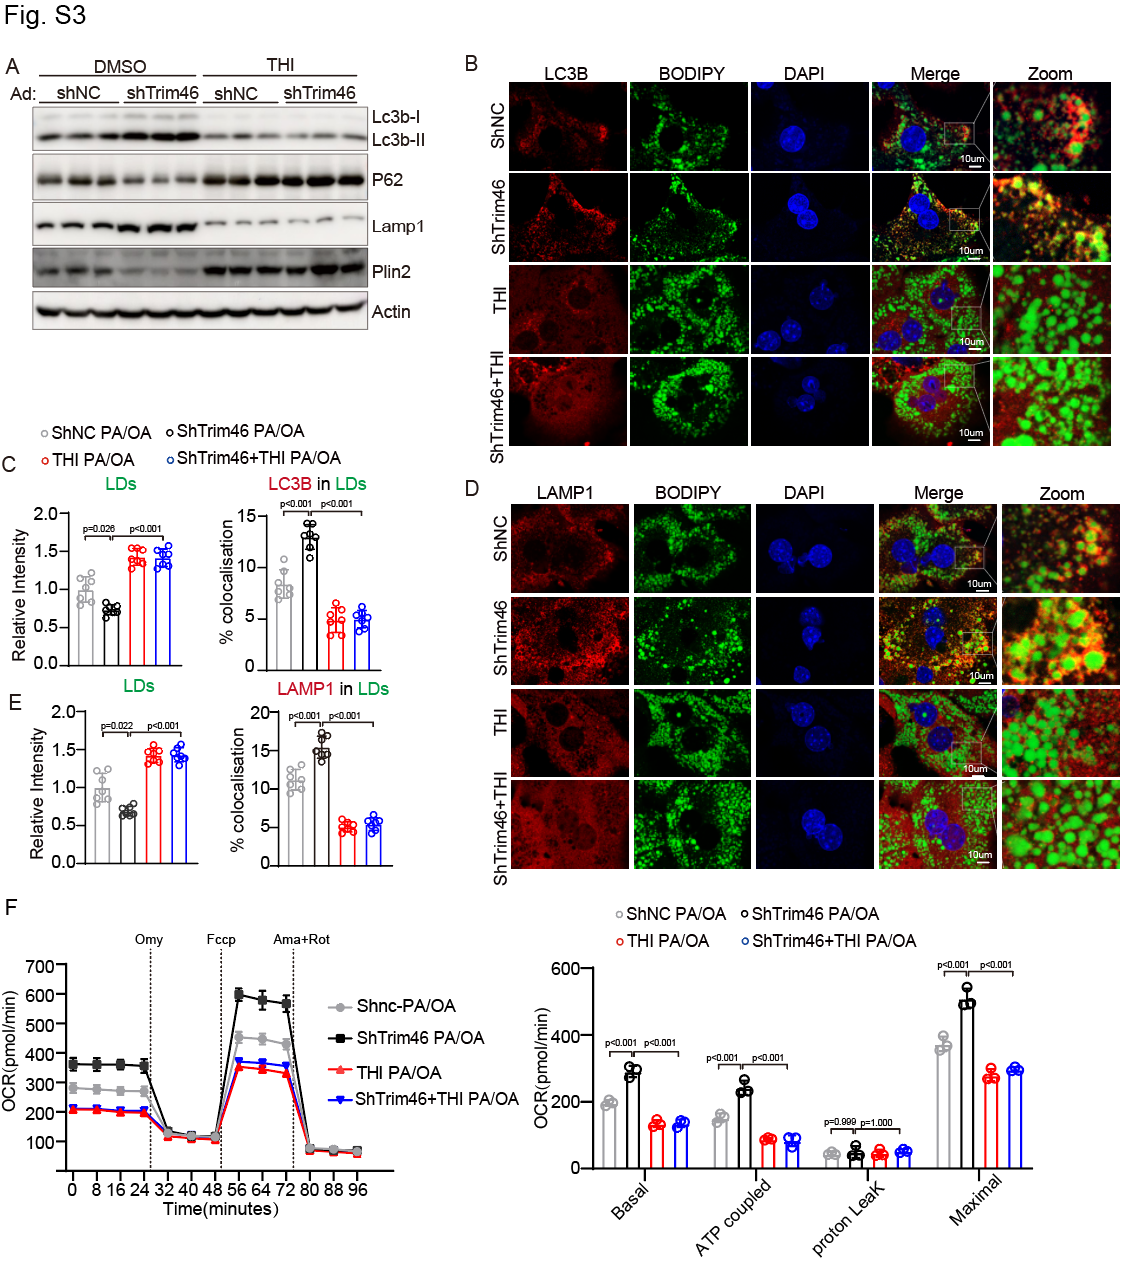


**Supplementary Fig. S3** (A) Representative western blot images showing the protein levels of Sgpl1, Lc3b, P62, Lamp1 and Plin2 in mice primary hepatocytes infected with Ad-Shnc/Ad-*ShTrim46* followed by treatment with or without THI administration. *n =* 3 independent experiments. (B-E) Representative confocal microscopy images of LC3B (B) or LAMP1 (D) on Lipid droplets in the indicated groups of cells followed by treatment with PA/OA (0.5/1mM) treatment for 24 hours. Scale bars, 10μm. Quantification of relative fluorescence intensity shown (LC3B (C) or LAMP1 (E)) in the panel represents one independent experiment. (F) Representative and statistical results of respiration in mice primary hepatocytes in the indicated groups by treatment with PA/OA (0.5/1mM) treatment for 12 hours. *n =* 3 independent experiments. All data are shown as the mean ± s.d.

**T****able S1. sgRNA target *Trim46* for** **adeno-associated virus8 (AAV8) construction**

| Prime name | Species | Sequence (5’-3’) |
| --- | --- | --- |
| sg*Trim46*#1 | Mice | GGAGAAGTGGGCTCCGAACT |
| sg*Trim46*#2 | Mice | ACATACCCTGGGCGGAAGCG |

**Table S2. Primers for overexpression and** **luciferase reporter plasmids construction.**

| Gene | | Vector | | Primer Sequence (5’-3’) | | |
| --- | --- | --- | --- | --- | --- | --- |
| *TRIM46*-human | pHAGE | | | | F:TCGGGTTTAAACGGATCCGCCACCATGGCAGAGGGTGAGGATA | |
| R:GGGCCCTCTAGACTCGAGGTCCAGCTTGGCGAAGCCCC | |
| *TRIM46*(1-263aa)-human | pHAGE | | | | F:TCGGGTTTAAACGGATCCGCCACCATGGCAGAGGGTGAGGATA | |
| R:GGGCCCTCTAGACTCGAGCACTGGTGTGATCTTGTGCC | |
| *TRIM46*(1-400aa)-human | pHAGE | | | | F:TCGGGTTTAAACGGATCCGCCACCATGGCAGAGGGTGAGGATA | |
| R:GGGCCCTCTAGACTCGAGCCGGAATGTCTGGAGGGCTT | |
| *TRIM46*(1-429aa)--human | pHAGE | | | | F:TCGGGTTTAAACGGATCCGCCACCATGGCAGAGGGTGAGGATA | |
| R:GGGCCCTCTAGACTCGAGTCAGGCACTACTGGGCACCTTC | |
| *TRIM46*(1-528aa)--human | pHAGE | | | | F:TCGGGTTTAAACGGATCCGCCACCATGGCAGAGGGTGAGGATA | |
| R:GGGCCCTCTAGACTCGAGTGCCGGGGGCGTGTGCAGGT | |
| *TRIM46*(167-759aa)--human | pHAGE | | | | F:TCGGGTTTAAACGGATCCGCCACCATGGGAGGTGCCATCCTGTGCC | |
| R:GGGCCCTCTAGACTCGAGGTCCAGCTTGGCGAAGCCCC | |
| *TRIM46*(264-759aa)--human | pHAGE | | | | F:TCGGGTTTAAACGGATCCGCCACCATGCTCAGTGCCTACCAGGCC | |
| R:GGGCCCTCTAGACTCGAGGTCCAGCTTGGCGAAGCCCC | |
| *TRIM46*(401-759aa)--human | pHAGE | | | | F:TCGGGTTTAAACGGATCCGCCACCATGCCAGCTGCCAGCTCCTCC | |
| R:GGGCCCTCTAGACTCGAGGTCCAGCTTGGCGAAGCCCC | |
| *TRIM46*(430-759aa)--human | | pHAGE- | | | F:TCGGGTTTAAACGGATCCGCCACCATGCCTGAGGCCCCCGTCATT | |
| R:GGGCCCTCTAGACTCGAGGTCCAGCTTGGCGAAGCCCC | |
| *TRIM46*(C33A/C36A)--human | | pHAGE- | | | F:GAGAAGGAACTGCTGGCCCCAGTGGCTCAAGAGATGTACAAG | |
| R:CTTGTACATCTCTTGAGCCACTGGGGCCAGCAGTTCCTTCTC | |
| *TRIM46*(C48A/C53A)--human | | pHAGE- | | | F:CCACTGGTGCTGCCCGCTACCCACAACGTGGCCCAGGCCTGTGCCCGA | |
| R:TCGGGCACAGGCCTGGGCCACGTTGTGGGTAGCGGGCAGCACCAGTGG | |
| *SGPL1*-human | | pHAGE | | | F:TCGGGTTTAAACGGATCCATGCCTAGCACAGACCTTCT | |
| R:GGGCCCTCTAGACTCGAGTCAGTGGGGTTTTGGAGAA | |
| *SGPL1*(Δ1-40aa)-human | | pHAGE | | | F:TCGGGTTTAAACGGATCCCAGCTAATTGCATGGAGTG | |
| R:GGGCCCTCTAGACTCGAGTCAGTGGGGTTTTGGAGAA | |
| *SGPL1*(Δ41-61aa)-human | | pHAGE | | | F: CCAAGTATGAGCCCTGGCAGCCAGAGAGTTTATG | |
| R: CATAAACTCTCTGGCTGCCAGGGCTCATACTTGG | |
| *SGPL1*(Δ167-452aa)-human | | pHAGE | | | F: CCTTGTGAAGGCTTATGGAGATCTGGGATCCCGT | |
| R: ACGGGATCCCAGATCTCCATAAGCCTTCACAAGG | |
| *SGPL1*(K107R)-human | | pHAGE | | | F: CAAGAACATGTCATTCCTGAGAGTGGACAAAGAGTAT | |
| R: ATACTCTTTGTCCACTCTCAGGAATGACATGTTCTTG | |
| *SGPL1*(K342R)-human | | pHAGE | | | F: ACCCATTTGATTTCCGGGTGAGAGGTGTAACCAGCAT | |
| R: ATGCTGGTTACACCTCTCACCCGGAAATCAAATGGGT | |
| *CREB3*--human | | | pHAGE | | | F: TCGGGTTTAAACGGATCCATGGAGCTGGAATTGGAT |
| R: GGGCCCTCTAGACTCGAGCTAGCCTGAGTATCTGTC |
| *HNRNPUL2*--human | | | pHAGE | | | F:TCGGGTTTAAACGGATCCATGGAGGTGAAGCGGCTG |
| R: GGGCCCTCTAGACTCGAGTCACCGATACCCTTGGTACC |
| *PPIA*--human | | | pHAGE | | | F:TCGGGTTTAAACGGATCCATGGTCAACCCCACCGTGTT |
| R:GGGCCCTCTAGACTCGAGTTATTCGAGTTGTCCACAGGT |
| *ALG5*--human | | | pHAGE | | | F:TCGGGTTTAAACGGATCCATGGCTCCGCTTCTGTTGC |
| R:GGGCCCTCTAGACTCGAGCTAATTCATTTTCCGAGTT |
| *ITPR1*--human | | | pHAGE | | | F:TCGGGTTTAAACGGATCCATGTCTGACAAAATGTCTA |
| R:GGGCCCTCTAGACTCGAGTTATGCTGGTTGTTGTGGG |
| *TRIM46*-(promoter)-human | | | pGL4.17 | | | F:GCCTAACTGGCCGGTACCAAGAGAAAAGATTAAGGGCAA |
| R:GATCTTGATATCCTCGAGTGTTCCAGGTCCCAGCTTG |
| *TRIM46*-promoter(-2100//-1600)-human | | | pGL4.17 | | | F:GCCTAACTGGCCGGTACCAAGAGAAAAGATTAAGGGCAA |
| R: GATCTTGATATCCTCGAGAAAGCAAGAAACTTTGGT |
| *TRIM46*-promoter(-1600//-1100)-human | | | pGL4.17 | | | F: GCCTAACTGGCCGGTACCCAAAGGCCTTCTCTTCCA |
| R: GATCTTGATATCCTCGAGCTCTCCTCCCTCCTGTCC |
| *TRIM46*-promoter(-1100//-500)-human | | | pGL4.17 | | | F:GCCTAACTGGCCGGTACCCGCCAGCGAGGTGCCCGT |
| R: GATCTTGATATCCTCGAGCAGACGCACCAGGTACGA |
| *TRIM46*-promoter(-500//-135)-human | | | pGL4.17 | | | F: GCCTAACTGGCCGGTACCCTGCCACTCTGTACAAGG |
| R:GATCTTGATATCCTCGAGTGTTCCAGGTCCCAGCTTG |
| *TRIM46*-promoter(mutans)-human | | | pGL4.17 | | | F:CGCTCCCGGTGGAACCCAAAAAAAAAAAAATCTGTCGGGAGAGGACGA |
| R:TCGTCCTCTCCCGACAGATTTTTTTTTTTTTGGGTTCCACCGGGAGCG |
| *TRIM46*--human | | | pGEX-6P- | | | F: GGGCCCCTGGGATCCATGGCAGAGGGTGAGGATA |
| R: ATGCGGCCGCTCGAGTCAGTCCAGCTTGGCGAA |
| *SGPL1*--human | | | pET-21b | | | F: ATGGGTCGGGATCCGATGCCTAGCACAGACCTTCT |
| R: TGCGGCCGCAAGCTTGTGGGGTTTTGGAGAACCAT |
| *Trim46*--mice | | | pENTR | | | F:GGCTAGCGATATCGGATCCGCCACCATGGCTGAGGGTGAGGATAT |
| R:CGTCCTTGTAATCACTAGTGTCCAGTTTGGCAAAGCCCC |
| *Sgpl1*--mice | | | pENTR | | | F:GGCTAGCGATATCGGATCCGCCACCATGCCCGGAACCGACCTCC |
| R:CGTCCTTGTAATCACTAGTGCGGGGCTTTGGAGAACCGT |

**Table S3. The target sequences for the shRNAs in RNAi Vectors**

| Prime name | Species | Sequence (5’-3’) |
| --- | --- | --- |
| *ShTRIM46* | Human | GCTGACAAAGAGCCTGACATT |
| *ShCREB3* | Human | CGGAGGAAGATTCGAAATAAA |
| *ShTrim46#1* | Mice | CTAGTCCGCATCAGTACAATT |
| *ShTrim46#2* | Mice | GCCAAACAGCTGCATAACATT |
| *ShSgpl1#1* | Mice | TCAGGAAGATGCCATTTATTG |
| *ShSgpl1#2* | Mice | GTTGGCTGTCAGATATAAATT |

**Table S4. The primers for CHIP-qPCR**

| Gene | Species | Primer Sequence (5’-3’) |
| --- | --- | --- |
| *TRIM46*-promoter(-1100//-950) | Human | F:CGCCAGCGAGGTGCCCGTAC |
| R:GCTGCAGTCCCGGGAGTTCT |
| *TRIM46*- promoter (-950//-800) | Human | F:CACACGCCCCAACTCCCCAC |
| R:GGGTGGACAAGCTTTCCTCG |
| *TRIM46*- promoter (-800//-650) | Human | F:ACCCAAACCCCGACCCCCT |
| R:GGTAAGCGCTGACGCATGCG |
| *TRIM46*- promoter (-650//-500) | Human | F:CGCGGACTTGCTACTCCTCGC |
| R:CAGACGCACCAGGTACGAGG |

**Table S5. The primers for qPCR**

| Gene | Species | Primer Sequence (5’-3’) |
| --- | --- | --- |
| *TRIM46* | Human | F: GATTGCCCGAGCCACTGAA |
| R: AGGCACTCGCAGGAAGTTAAG |
| *Trim46* | Mice | F:TTCCGGGCTTTTCCGAAACC |
| R: TGGTGGCCTCTAGTGGTGG |
| *Cd36* | Mice | F: AGATGACGTGGCAAAGAACAG |
| R: CCTTGGCTAGATAACGAACTCTG |
| *Fatp5* | Mice | F: TTTCTGGGGTTGGCCAAGTT |
| R: CTCCTGGAGGTCTGGATCCA |
| *Srebp1c* | Mice | F: GACCCTACGAAGTGCACACA |
| R: TGTCGGGCTCAGAGTCACTA |
| *Acc1* | Mice | F: AATGAACGTGCAATCCGATTTG |
| R: ACTCCACATTTGCGTAATTGTTG |
| *Fasn* | Mice | F: AAGTTGCCCGAGTCAGAGAA |
| R: CGTCGAACTTGGAGAGATCC |
| *Scd1* | Mice | F: CAAACACCCGGCTGTCAAAG |
| R: TGAAGCACATCAGCAGGAGG |
| *Gpat1* | Mice | F: ATGAAACGCACACAAGGCAC |
| R: TTGCCTCTTGGACTCTGCTG |
| *Dgat2* | Mice | F: GCGCTACTTCCGAGACTACTT |
| R: GGGCCTTATGCCAGGAAACT |
| *Ppara* | Mice | F: AACCTGAGGAAGCCGTTCTG |
| R: TCTGCAGGTGGAGCTTAAGC |
| *Cpt1a* | Mice | F: ACAATTCCCCTCTGCTCTGC |
| R: TACACGACAATGTGCCTGCT |
| *Acox1* | Mice | F: TAACTTCCTCACTCGAAGCCA |
| R: AGTTCCATGACCCATCTCTGTC |
| *Ucp2* | Mice | F: CAGCGCCAGATGAGCTTTG |
| R: GGAAGCGGACCTTTACCACA |
| *Acadam* | Mice | F: GGGGATGTCTCACAATGCCA |
| R: CAGACTCTGGGTTCAGCTGG |
| *Tnfa* | Mice | F: GGTGATCGGTCCCCAAAGGGATGA |
| R: TGGTTTGCTACGACGTGGGCT |
| *Il6* | Mice | F: TCTGCAAGAGACTTCCATCCAGTTGC |
| R: AGCCTCCGACTTGTGAAGTGGT |
| *Il1b* | Mice | F: CGGACCCCAAAAGATGAAGGGCTG |
| R: AGCTGCCACAGCTTCTCCACA |
| *Cxcl10* | Mice | F: ATCATCCCTGCGAGCCTATCCT |
| R: GACCTTTTTTGGCTAAACGCTTTC |
| *Tgfb1* | Mice | F: CTTCAATACGTCAGACATTCGGG |
| R: GTAACGCCAGGAATTGTTGCTA |
| *Col1a1* | Mice | F: CTGGCGGTTCAGGTCCAAT |
| R: TTCCAGGCAATCCACGAGC |
| *Timp1* | Mice | F: TACACCCCAGTCATGGAAAGC |
| R: CGGCCCGTGATGAGAAACT |
| *Ctgf* | Mice | F: GGGCCTCTTCTGCGATTTC |
| R: ATCCAGGCAAGTGCATTGGTA |
| *b-Actin* | Mice | F: TACTGCTCTGGCTCCTAGCA |
| R: CGGACTCATCGTACTCCTGC |

**Table S6.** **Antibodies used in the research.**

| Antibodies name | Source | | Cat No. |
| --- | --- | --- | --- |
| Anti-TRIM46 | Proteintech | | 21026-1-AP |
| Anti-p-IKKa/b (Ser176/180) | Cell Signaling Technology | | 2697S |
| Anti-IKKa/b | Zenbio | | R381216 |
| Anti-p-P65(Ser536) | Zenbio | | 310013 |
| Anti-P65 | Zenbio | | 380172 |
| Anti-CTGF | Zenbio | | R24001 |
| Anti-a-SMA | Zenbio | | R380653 |
| Anti-LC3B | Proteintech | | 14600-1-AP |
| Anti- SQSTM1/p62 | Abclonal | | A19700 |
| Anti-LAMP1 | Abclonal | | A21194 |
| Anti-HA | Medical Biological Laboratories | | M180-3 |
| Anti-Flag | Medical Biological Laboratories | | M185 |
| Anti-His | Abclonal | | AE003 |
| Anti-GST | Proteintech | | 10000-0-AP |
| Anti-SGPL1 | Abclonal | | A26855 |
| Anti-SGPL1 | Thermofisher | | H00008879-B01P |
| Anti-CREB3 | Proteintech | | 11275-1-AP |
| Anti-b-Actin | Abclonal | | AC026 |
| Anti-F4/80 | Boster | | 29414-1-AP |
| HRP-conjugated Affinipure Goat Anti-Mouse IgG(H+L) | | Abclonal | SA00001-1 |
| HRP-conjugated Affinipure Goat Anti-Rabbit IgG(H+L) | | Abclonal | SA00001-2 |
| Multi-rAb™ CoraLite® Plus 488-Goat Anti-Rabbit Recombinant Secondary Antibody (H+L) | | Proteintech | RGAR002 |
| Multi-rAb™ CoraLite® Plus 488-Goat Anti-Mouse Recombinant Secondary Antibody (H+L) | | Proteintech | RGAM002 |
| Multi-rAb™ CoraLite® Plus 594-Goat Anti-Rabbit Recombinant Secondary Antibody (H+L) | | Proteintech | RGAR004 |
| Multi-rAb™ CoraLite® Plus 594-Goat Anti-Mouse Recombinant Secondary Antibody (H+L) | | Proteintech | RGAM004 |
